# Supplementary material for: Reduced alkaline earth metal (Ca, Sr) substituted LaCoO3 catalysts for succinic acid conversion
Source: Royal Society of Chemistry journal article supplement (doi:10.1039/d2nj03714a), 2022-01-01

Supplementary Information

**Reduced alkaline earth metal (Ca, Sr) substituted LaCoO<sub>3</sub> catalysts for the succinic acid conversion.**

Mabel Rojas, <sup>\*a,b</sup> Gabriel Bernales, <sup>a,c</sup> Ana Belen Dongil, <sup>d</sup> Gina Pecchi <sup>a,c</sup> and Néstor Escalona <sup>\*a,b,e,f</sup>

---

*a. Millennium Nuclei on Catalytic Processes towards Sustainable Chemistry (CSC), Chile.*

*b. Facultad de Química y de Farmacia, Pontificia Universidad Católica de Chile, Avenida Vicuña Mackenna 4860, Macul, Santiago, 7820436, Chile.*

*c. Departamento Físico Química, Facultad de Ciencias Químicas, Universidad de Concepción.*

*d. Instituto de Catálisis y Petroleoquímica CSIC, Marie Curie 2 28049 Madrid Spain.*

*e. Departamento de Ingeniería Química y Bioprocesos, Escuela de Ingeniería, Pontificia Universidad Católica de Chile, Avenida Vicuña Mackenna 4860, Macul, Santiago, 7820436, Chile.*

*f. Universidad de Concepción, Unidad de Desarrollo Tecnológico, UDT.*

---

\*Corresponding authors: Mabel Rojas, [mnrojas1@uc.cl](mailto:mnrojas1@uc.cl), Néstor Escalona, [neescalona@ing.puc.cl](mailto:neescalona@ing.puc.cl)

## Supplementary Information

| Table of contents                                                                                                                                                                                                                                                                                                                 | Page      |
|-----------------------------------------------------------------------------------------------------------------------------------------------------------------------------------------------------------------------------------------------------------------------------------------------------------------------------------|-----------|
| <b>Table S1.</b> Prepared solids, labels, Co, Sr and a bulk wt% (nominal in parenthesis) for $\text{La}_{1-x}\text{Ca}_x\text{CoO}_3$ and $\text{La}_{1-x}\text{Sr}_x\text{CoO}_3$ ( $x=0.0, 0.2, 0.4$ ) perovskites.                                                                                                             | <b>3</b>  |
| <b>Table S2.</b> Binding energy (eV) and atomic ratios of reduced perovskites (Co/La+M (M=Ca or Sr)).                                                                                                                                                                                                                             | <b>3</b>  |
| <b>Figure S1.</b> $\text{N}_2$ adsorption isotherms of the calcined at $700^\circ\text{C}$ perovskites: a) $\text{La}_{1-x}\text{Ca}_x\text{CoO}_3$ ; b) $\text{La}_{1-x}\text{Sr}_x\text{CoO}_3$ .                                                                                                                               | <b>4</b>  |
| <b>Figure S2.</b> Zoom of the $2\theta$ values of the $47^\circ$ diffraction peaks.                                                                                                                                                                                                                                               | <b>5</b>  |
| <b>Figure S3.</b> FTIR of the calcined at $700^\circ\text{C}$ $\text{La}_{1-x}\text{A}_x\text{CoO}_3$ (A = Ca, Sr; $x = 0, 0.2, 0.4$ ) perovskites.                                                                                                                                                                               | <b>6</b>  |
| <b>Figure S4.</b> FTIR of the reduced at $550^\circ\text{C}$ and passivated $\text{La}_{1-x}\text{A}_x\text{CoO}_3$ (A = Ca, Sr; $x = 0, 0.2, 0.4$ ) perovskites.                                                                                                                                                                 | <b>7</b>  |
| <b>Figure S5.</b> XPS spectra of the O 1s, Co 2p, La 3d, Ca 2p and Sr 3d regions of reduced and passivated $\text{La}_{1-x}\text{A}_x\text{CoO}_3$ (A = Ca, Sr; $x = 0, 0.2, 0.4$ ) perovskites.                                                                                                                                  | <b>8</b>  |
| <b>Figure S6.</b> TEM micrography of a) $\text{LaCoO}_3$ , b) $\text{La}_{0.8}\text{Ca}_{0.2}\text{CoO}_3$ , c) $\text{La}_{0.6}\text{Ca}_{0.4}\text{CoO}_3$ , d) $\text{La}_{0.8}\text{Sr}_{0.2}\text{CoO}_3$ , e) $\text{La}_{0.6}\text{Sr}_{0.4}\text{CoO}_3$ and f) electron diffraction performed for the $x\text{Ca}=0.2$ . |           |
| <b>Figure S7.</b> $\text{NH}_3$ DTP-MS of the reduced at $500^\circ\text{C}$ and passivated $\text{La}_{1-x}\text{A}_x\text{CoO}_3$ (A = Ca, Sr; $x = 0, 0.2, 0.4$ ) perovskites.                                                                                                                                                 | <b>10</b> |
| <b>Figure S8.</b> $\text{CO}_2$ DTP-MS of the reduced at $500^\circ\text{C}$ and passivated $\text{La}_{1-x}\text{A}_x\text{CoO}_3$ (A = Ca, Sr; $x = 0, 0.2, 0.4$ ) perovskites.                                                                                                                                                 | <b>11</b> |
| <b>Figure S9.</b> He DTP-MS of the reduced at $500^\circ\text{C}$ and passivated $\text{La}_{1-x}\text{A}_x\text{CoO}_3$ (A = Ca, Sr; $x = 0, 0.2, 0.4$ ) perovskites.                                                                                                                                                            | <b>12</b> |
| <b>Figure S10.</b> Conversion of succinic acid and yield of products vs. time over reduced at                                                                                                                                                                                                                                     | <b>13</b> |

|                                                                                                                                                                                                                                                                         |  |
|-------------------------------------------------------------------------------------------------------------------------------------------------------------------------------------------------------------------------------------------------------------------------|--|
| 500°C and passivated (a) $\text{LaCoO}_3$ , (b) $\text{La}_{0.8}\text{Ca}_{0.2}\text{CoO}_3$ , (c) $\text{La}_{0.6}\text{Ca}_{0.4}\text{CoO}_3$ , (d) $\text{La}_{0.8}\text{Sr}_{0.2}\text{CoO}_3$<br>and (e) $\text{La}_{0.6}\text{Sr}_{0.4}\text{CoO}_3$ perovskites. |  |
|-------------------------------------------------------------------------------------------------------------------------------------------------------------------------------------------------------------------------------------------------------------------------|--|

**Table S1.** Prepared solids, labels, Co, Sr and a bulk wt% (nominal in parenthesis) for  $\text{La}_{1-x}\text{Ca}_x\text{CoO}_3$  and  $\text{La}_{1-x}\text{Sr}_x\text{CoO}_3$  ( $x=0.0, 0.2, 0.4$ ) perovskites.

| Perovskites                                  | Label        |             | %           |        |           |
|----------------------------------------------|--------------|-------------|-------------|--------|-----------|
|                                              | Oxide        | Reduced     | Co          | Sr     | Ca        |
| $\text{LaCoO}_3$                             | x=0 calc     | x=0 red     | 15.8 (24.0) | -      | -         |
| $\text{La}_{0.8}\text{Ca}_{0.2}\text{CoO}_3$ | xCa=0.2-calc | xCa=0.2-red | 18.6 (26.0) | -      | 3.2 (3.5) |
| $\text{La}_{0.6}\text{Ca}_{0.4}\text{CoO}_3$ | xCa=0.4-calc | xCa=0.4-red | 21.4 (28.6) | -      | 6.1 (7.8) |
| $\text{La}_{0.8}\text{Sr}_{0.2}\text{CoO}_3$ | xSr=0.2-calc | xSr=0.2-red | 16.6 (25.0) | (7.4)  | -         |
| $\text{La}_{0.6}\text{Sr}_{0.4}\text{CoO}_3$ | xSr=0.4-calc | xSr=0.4-red | 18.5 (26.2) | (15.6) | -         |

**Table S2.** Surface atomic (%) for reduced-passivated  $\text{La}_{1-x}\text{Ca}_x\text{CoO}_3$  and  $\text{La}_{1-x}\text{Sr}_x\text{CoO}_3$  ( $x=0.0, 0.2, 0.4$ ) perovskites.

| Perovskites                                  | Surface atomic (%) |      |                  |     |          |
|----------------------------------------------|--------------------|------|------------------|-----|----------|
|                                              | La                 | O    | C <sup>[a]</sup> | Co  | Sr or Ca |
| $\text{LaCoO}_3$                             | 12.4               | 58.3 | 24.5             | 4.4 | -        |
| $\text{La}_{0.8}\text{Ca}_{0.2}\text{CoO}_3$ | 8.9                | 58.0 | 22.3             | 3.9 | 6.9      |
| $\text{La}_{0.6}\text{Ca}_{0.4}\text{CoO}_3$ | 6.8                | 56.6 | 25.0             | 3.0 | 8.6      |
| $\text{La}_{0.8}\text{Sr}_{0.2}\text{CoO}_3$ | 11.9               | 57.3 | 22.6             | 4.9 | 3.3      |
| $\text{La}_{0.6}\text{Sr}_{0.4}\text{CoO}_3$ | 10.9               | 58.3 | 23.7             | 4.8 | 3.2      |

[a] C 1S acts as reference

**Figure S1.** N<sub>2</sub> adsorption isotherms of the calcined at 700°C perovskites: a) La<sub>1-x</sub>Ca<sub>x</sub>CoO<sub>3</sub>; b) La<sub>1-x</sub>Sr<sub>x</sub>CoO<sub>3</sub>.

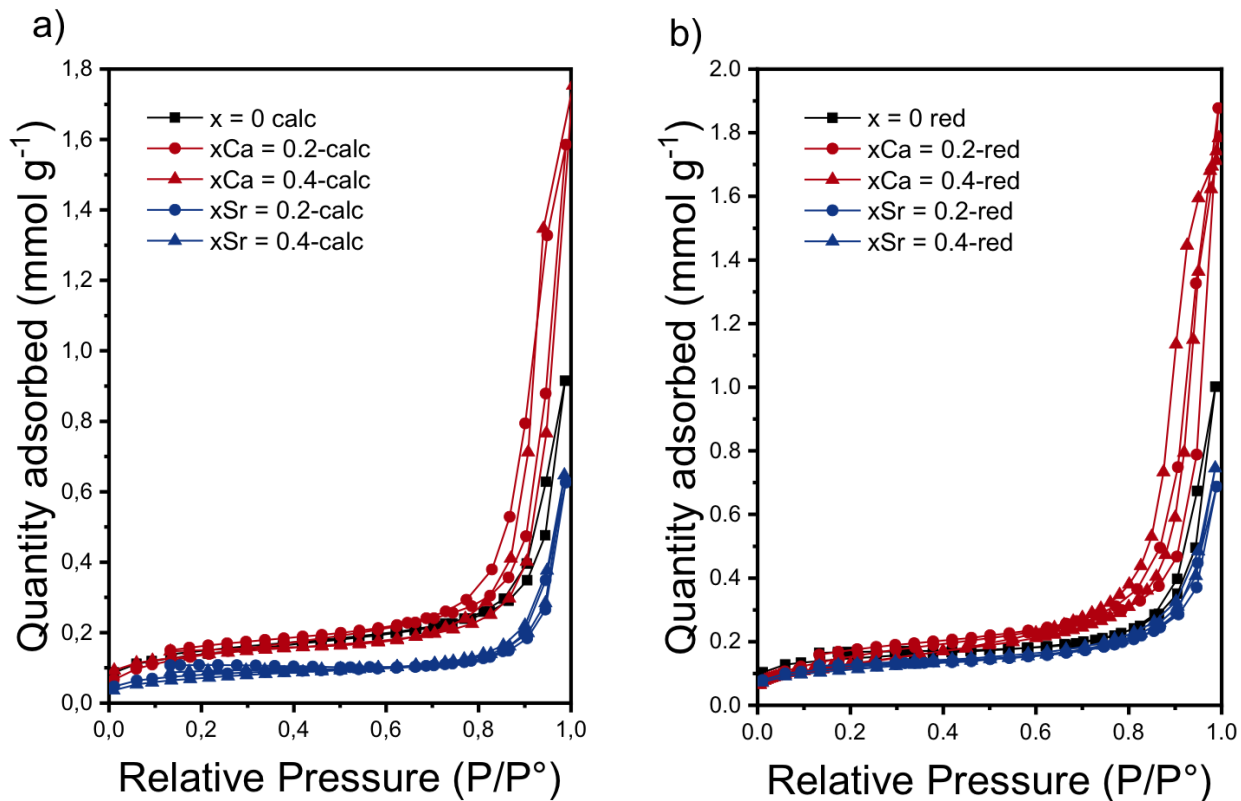

Figure S2. Zoom of the  $2\theta$  values of the  $47^\circ$  diffraction peaks.

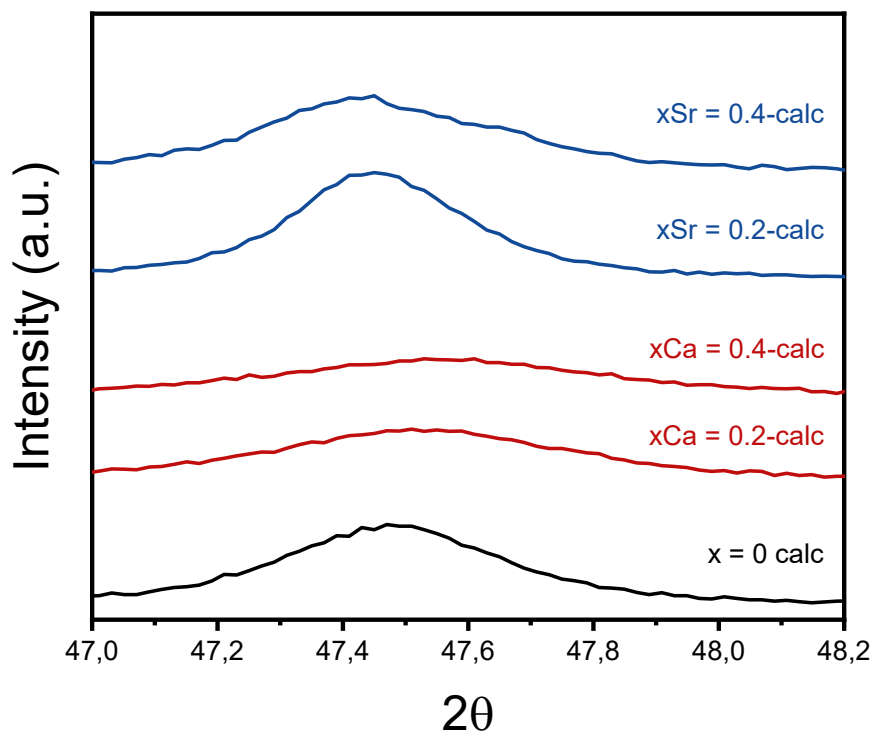

**Figure S3.** FTIR of the calcined at 700°C  $\text{La}_{1-x}\text{A}_x\text{CoO}_3$  (A = Ca, Sr; x = 0, 0.2, 0.4) perovskites.

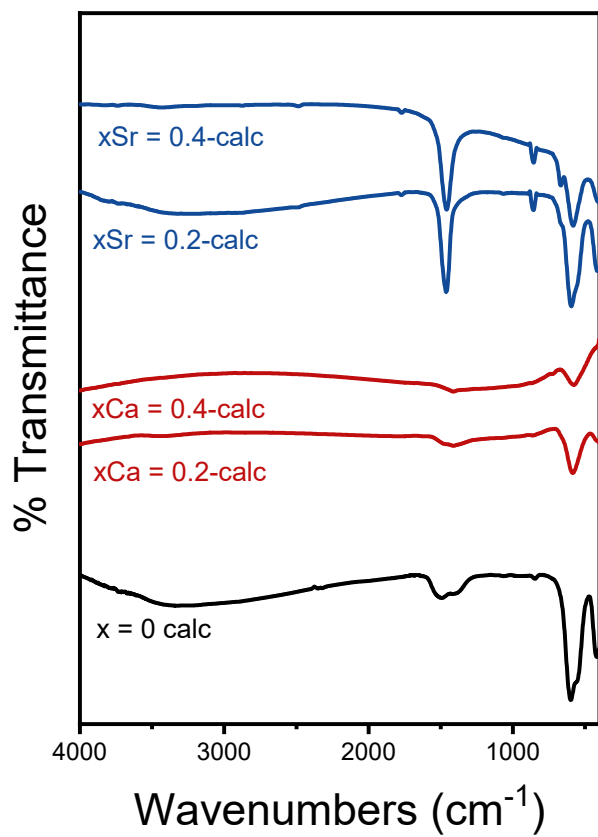

**Figure S4.** FTIR of the reduced at 550°C and passivated  $\text{La}_{1-x}\text{A}_x\text{CoO}_3$  (A = Ca, Sr; x = 0, 0.2, 0.4) perovskites.

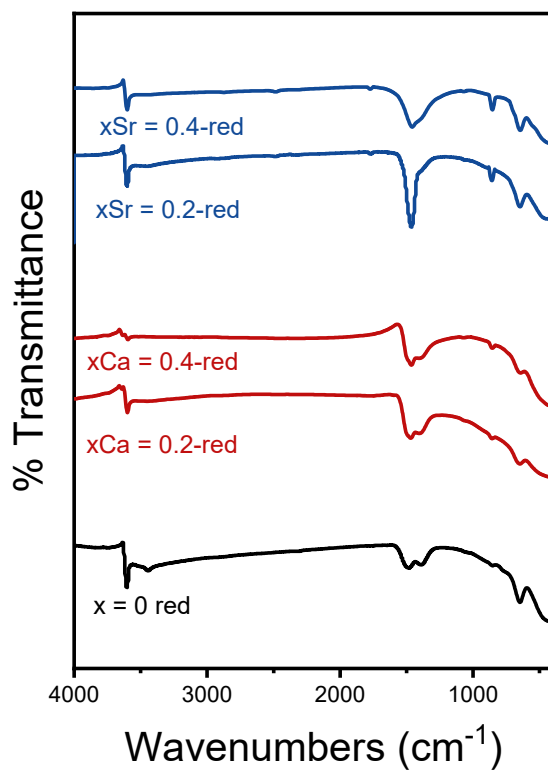



**Figure S5.** XPS spectra of the O 1s, Co 2p, La 3d, Ca 2p and Sr 3d regions of reduced and passivated  $\text{La}_{1-x}\text{A}_x\text{CoO}_3$  (A = Ca, Sr; x = 0, 0.2, 0.4) perovskites.

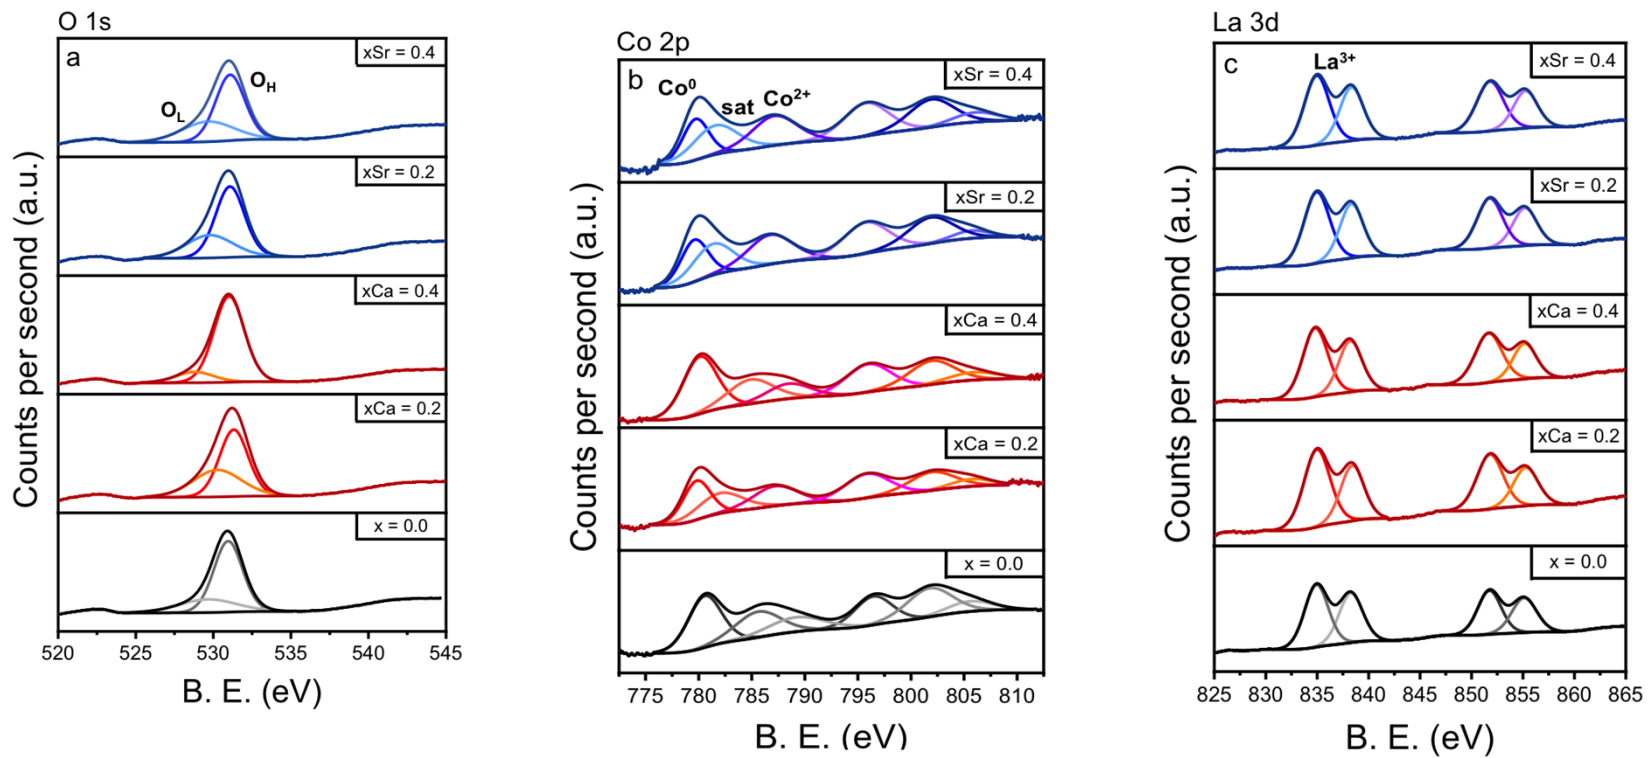

**Figure S5.** (continued)

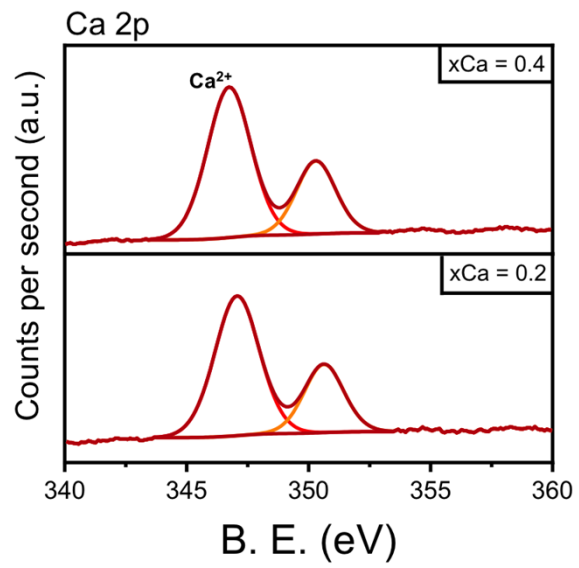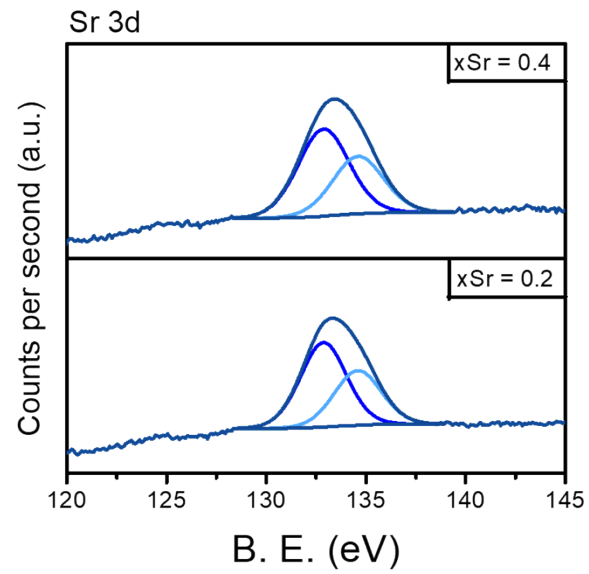

**Figure S6.** TEM micrography of a)  $\text{LaCoO}_3$ , b)  $\text{La}_{0.8}\text{Ca}_{0.2}\text{CoO}_3$ , c)  $\text{La}_{0.6}\text{Ca}_{0.4}\text{CoO}_3$ , d)  $\text{La}_{0.8}\text{Sr}_{0.2}\text{CoO}_3$ , e)  $\text{La}_{0.6}\text{Sr}_{0.4}\text{CoO}_3$  and f) electron diffraction performed for the  $x\text{Ca}=0.2$ .

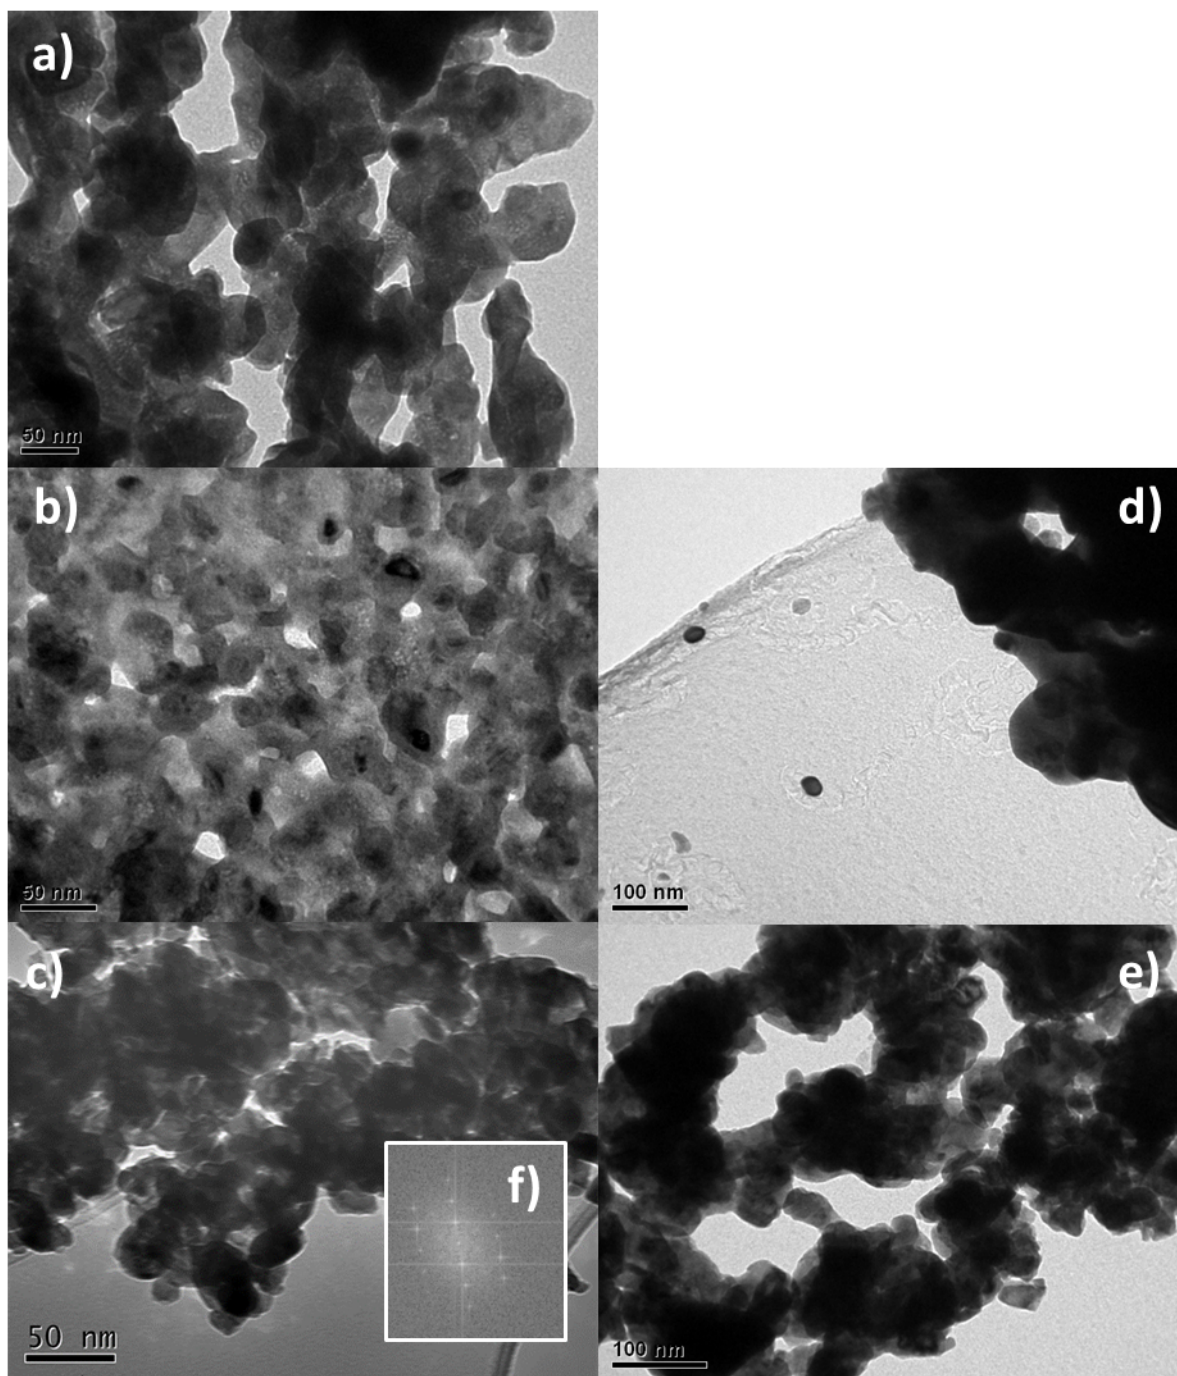

**Figure S7.**  $\text{NH}_3$  DTP-MS of the reduced at  $500^\circ\text{C}$  and passivated  $\text{La}_{1-x}\text{A}_x\text{CoO}_3$  ( $\text{A} = \text{Ca}, \text{Sr}; x = 0, 0.2, 0.4$ ) perovskites.

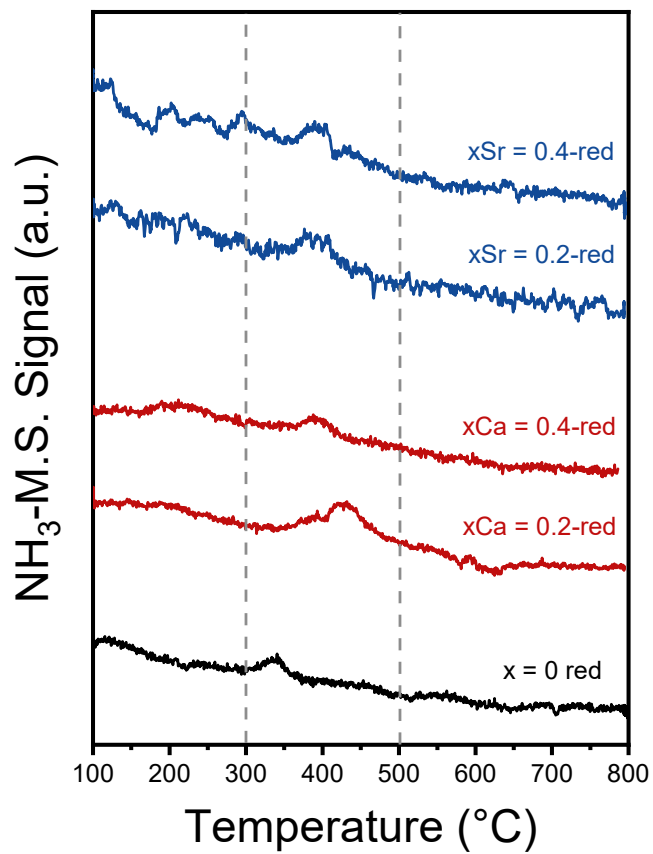

**Figure S8.** CO<sub>2</sub> DTP-MS of the reduced at 500°C and passivated La<sub>1-x</sub>A<sub>x</sub>CoO<sub>3</sub> (A = Ca, Sr; x = 0, 0.2, 0.4) perovskites.

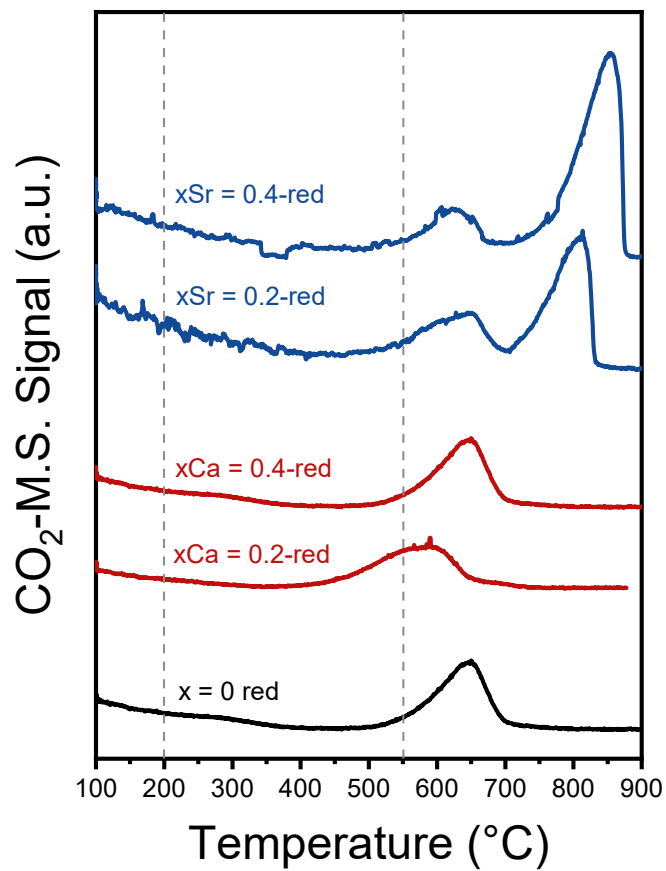

**Figure S9.** He DTP-MS of the reduced at 500°C and passivated  $\text{La}_{1-x}\text{A}_x\text{CoO}_3$  (A = Ca, Sr; x = 0, 0.2, 0.4) perovskites.

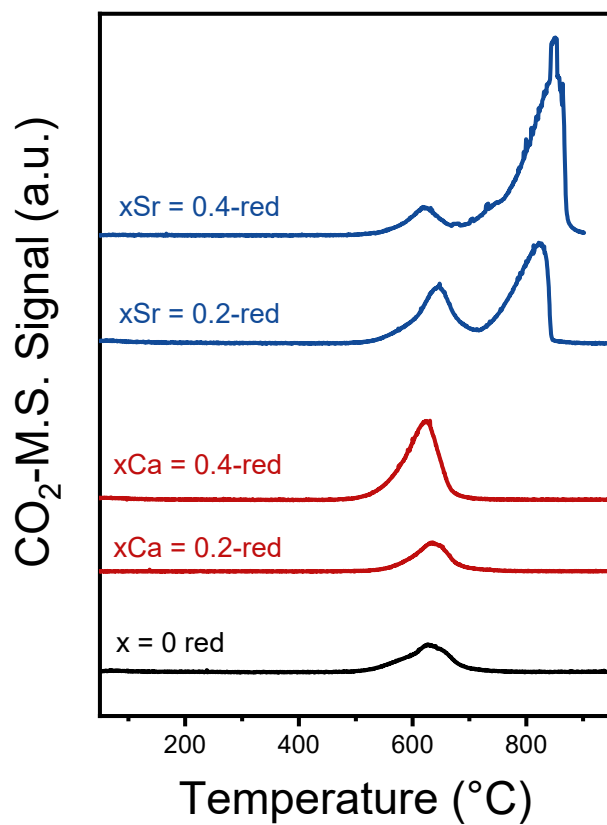

**Figure S10.** Conversion of succinic acid and yield of products vs. time over reduced at 500°C and passivated (a)  $\text{LaCoO}_3$ , (b)  $\text{La}_{0.8}\text{Ca}_{0.2}\text{CoO}_3$ , (c)  $\text{La}_{0.6}\text{Ca}_{0.4}\text{CoO}_3$ , (d)  $\text{La}_{0.8}\text{Sr}_{0.2}\text{CoO}_3$  and (e)  $\text{La}_{0.6}\text{Sr}_{0.4}\text{CoO}_3$  perovskites.

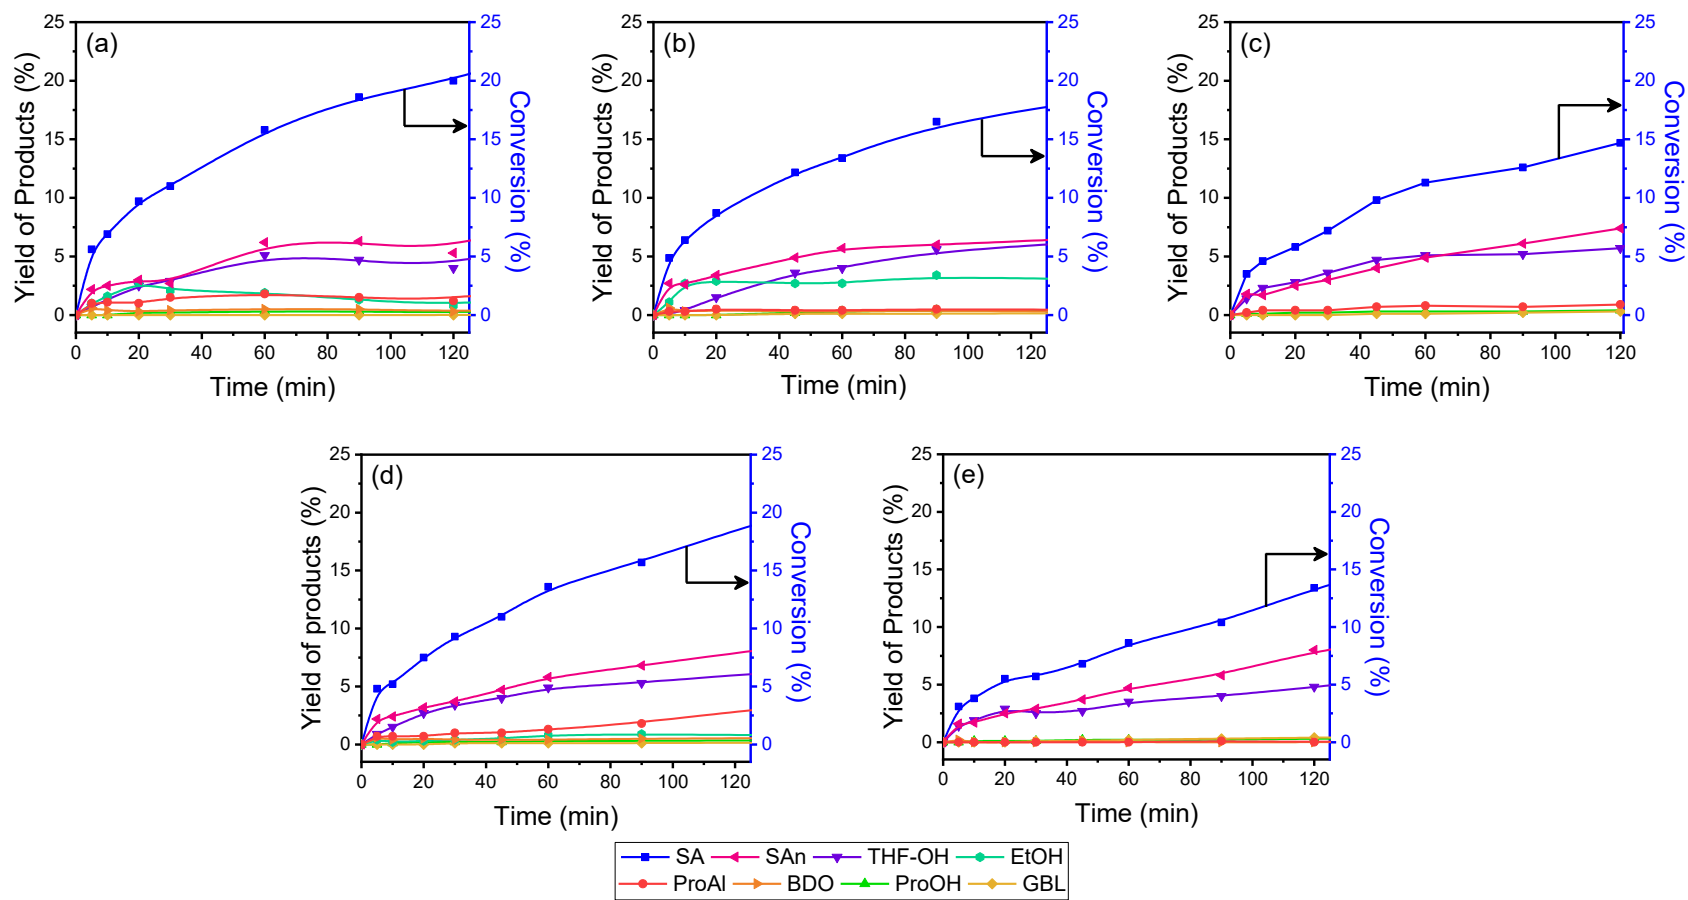

Supplement: d2nj03714a1.pdf [file d2nj03714a1.pdf]
